# Supplementary material for: Detection of rice sheath blight using an unmanned aerial system with high-resolution color and multispectral imaging
Source: PLoS One. 2018 May 10;13(5):e0187470. doi: 10.1371/journal.pone.0187470 (PMC5945033; doi:10.1371/journal.pone.0187470)
Supplement: S1 Table — (XLSX) [file pone.0187470.s001.xlsx]

## Sheet: MC 8-23
Plant Pathology Group: Beaumont field strip 2015
SB-5, 67 entries, Disease Nursery for main crop (MC) (ShB = Sheath blight; NBLS = Narrow brown leaf spot)
Disease assessment date: 8/23/2015
														Leeve
		4'		4'		4'		4'		4'		4'		4'		4'		4'		4'		4'		4'
ShB(0=9)	Rep 1											3		3.5		4		4		8		3		7
ShB(0=9)	Rep 2											3		3		4		4		8		3		7
ShB(0=9)	Rep 3											2.5		3.5		4		4		8		3		7
NBLS (0-9)	Rep 1											0		0		0		0		6		0		5
NBLS (0-9)	Rep 2											0		0		0		0		5		0		5
NBLS (0-9)	Rep 3											0		0		0		0		7		0		5	8'
Growth stage												Soft dough		medium dough		medium dough		medium dough		near mature		milk		Near mature
Variety/line												XP760		XL753		CLXL729		CLXL745		Colorado		Rhondo		RU1403190
												S5-67		S5-66		S5-65		S5-64		S5-63		S5-62		S5-61
ShB(0=9)	Rep 1	4		4		3		5		4		5		6		8		7		6		8		5
ShB(0=9)	Rep 2	4		4		3		5		4		5		7		8		7		5		7		5
ShB(0=9)	Rep 3	4		4		3		5		4		5		8		8		7		7		9		5
NBLS (0-9)	Rep 1	0		0		0		4		3		4		0		2		0		5		0		3	8'
NBLS (0-9)	Rep 2	0		0		0		4		3		4		0		2		0		5		0		3
NBLS (0-9)	Rep 3	0		0		0		4		3		4		0		2		0		5		0		3
Growth stage		hard dough		medium dough		Milk		hard dough		Neat mature		hard dough		soft dough		soft dough		medium dough		near mature		medium dough		medum dough
Variety/line		RU1303144		RU1503147		RU1503150		RU1403153		Antonio		RU1303163		RU1403166		RU1503169		RU1303172		RU1503175		RU1403181		RU1303184
9'		S5-49		S5-50		S5-51		S5-52		S5-53		S5-54		S5-55		S5-56		S5-57		S5-58		S5-59		S5-60	9'
ShB(0=9)	Rep 1	4		4		4		5		7		8		6		6		8		6		9		4
ShB(0=9)	Rep 2	4		4		4		5		7		8		6		6		9		6		8		4
ShB(0=9)	Rep 3	4		4		4		5		7		8		6		6		7		6		9		4
NBLS (0-9)	Rep 1	2		2		0		3		3		2		2		5		3		5		3		0	8'
NBLS (0-9)	Rep 2	2		2		0		3		3		2		2		5		3		5		3		0
NBLS (0-9)	Rep 3	2		2		0		3		3		2		2		5		3		5		3		0
Growth stage		soft dough		soft dough		medium dough		near mature		medum dough		Soft dough		soft dough		mature		medum dough		hard dough		near mature		medum dough
Variety/line		RU1403141		RU1403138		RU1303135		RU1503132		RU1403129		RU1503126		RU1003123		RU1303116		RU1003113		RU1503110		RU1503107		RU1403104
		S5-48		S5-47		S5-46		S5-45		S5-44		S5-43		S5-42		S5-41		S5-40		S5-39		S5-38		S5-37
ShB(0=9)	Rep 1	3		7		5		6		6		5		7		8		7		7		6		7
ShB(0=9)	Rep 2	2		7		5		6		6		5		7		8		7		7		6		7
ShB(0=9)	Rep 3	4		7		5		6		6		5		7		8		7		7		6		7
NBLS (0-9)	Rep 1	0		2		0		0		0		0		2		4		3		4		2		3	8'
NBLS (0-9)	Rep 2	0		2		0		0		0		0		2		4		3		4		2		3
NBLS (0-9)	Rep 3	0		2		0		0		0		0		2		4		3		4		2		3
Growth stage		milk		soft dough		soft dough		soft dough		medum dough		milk		soft dough		medium dough		hard dough		hard dough		medum dough		medum dough
Variety/line		RU0703181		RU1003153		RU0903086		RU1503069		RU1303181		RU0903190		RU1203190		RU1203086		RU1403089		RU1503092		RU1503098		RU1403101
9'		S5-25		S5-26		S5-27		S5-28		S5-29		S5-30		S5-31		S5-32		S5-33		S5-34		S5-35		S5-36	9'
ShB(0=9)	Rep 1	3		4		4		4		9		8		7		8		7		9		7		3
ShB(0=9)	Rep 2	3		5		4		4		9		8		7		8		7		9		7		3
ShB(0=9)	Rep 3	3		4		4		4		9		8		7		8		7		9		7		3
NBLS (0-9)	Rep 1	0		0		3		0		4		3		2		2		2		5		2		3	8'
NBLS (0-9)	Rep 2	0		0		3		0		4		3		2		2		2		5		2		3
NBLS (0-9)	Rep 3	0		0		3		0		4		3		2		2		2		5		2		3
Growth stage		milk		soft dough		hard dough		milk		mature		mature		mature		near mature		near mature		near mature		medium dough		medum dough
Variety/line		RU0903147		RU1303153		RU0803181		RU1303138		RU0803153		RU1003098		Presidio		RU0803147		RU0903141		RU0803190		CL163		Rex
		S5-24		S5-23		S5-22		S5-21		S5-20		S5-19		S5-18		S5-17		S5-16		S5-15		S5-14		S5-13
ShB(0=9)	Rep 1	8		8		7		6		5		8		4		4		5		8		4		8
ShB(0=9)	Rep 2	7		8		7		6		5		8		5		4		5		9		4		8
ShB(0=9)	Rep 3	8		8		7		6		5		8		5		4		5		8		4		8
NBLS (0-9)	Rep 1	7		5		5		2		1		5		0		0		0		5		3		3	8'
NBLS (0-9)	Rep 2	8		5		5		2		1		5		0		0		0		5		3		3
NBLS (0-9)	Rep 3	7		5		5		2		1		5		0		0		0		5		3		3
Growth stage		near mature		near mature		hard dough		medium dough		medium dough		hard dough		medium dough		medium dough		hard dough		hard dough		soft dough		medum dough
Variety/line		Cl111		CL151		Mermentau		Jupiter		Cheniere		Cocodrie		CL271		LAH10		LAH169		Jazzman2		Della2		CL152
		S5-1		S5-2		S5-3		S5-4		S5-5		S5-6		S5-7		S5-8		S5-9		S5-10		S5-11		S5-12
														Drive way
General Growth Stages of Rice:
See germination, seeding, tillering, panicle differentiation (PD), boot, heading, milk, soft dough, medium dough, hard dough, and maturity.

## Sheet: MC 8-30
Plant Pathology Group: Beaumont field strip 2015
SB-5, 67 entries, Disease Nursery for main crop (MC) (ShB = Sheath blight; NBLS = Narrow brown leaf spot)
Disease assessment date: 8/30/2015
														Leeve
		4'		4'		4'		4'		4'		4'		4'		4'		4'		4'		4'		4'
ShB(0=9)	Rep 1											5		5		5.5		5		8		4		7
ShB(0=9)	Rep 2											5		5		5		6		9		5		7
ShB(0=9)	Rep 3											5		5		5		5		8		4		7
NBLS (0-9)	Rep 1											0		0		0		0		7		0		7
NBLS (0-9)	Rep 2											0		0		0		0		8		0		8
NBLS (0-9)	Rep 3											0		0		0		0		7		0		7	8'
Growth stage												Mid dough		Near mature		Near mature		near mature		Mature		Near mature		mature
Variety/line												XP760		XL753		CLXL729		CLXL745		Colorado		Rhondo		RU1403190
												S5-67		S5-66		S5-65		S5-64		S5-63		S5-62		S5-61
ShB(0=9)	Rep 1	6		5		5		7		5		8		5		7		8		8		8		7
ShB(0=9)	Rep 2	7		5		6		7		5		8		6		6		8		8		9		8
ShB(0=9)	Rep 3	6		5		5		6		6		8		5		7		7		8		8		7
NBLS (0-9)	Rep 1	6		0		0		5		5		7		0		3		5		5		7		6	8'
NBLS (0-9)	Rep 2	7		0		0		4		6		8		0		3		4		6		7		7
NBLS (0-9)	Rep 3	6		0		0		5		5		7		0		3		5		5		7		7
Growth stage		near mature		near mature		mid mature		Near mature		near mature		mature		Near mature		Near mature		near mature		mature		mature		Over mature
Variety/line		RU1303144		RU1503147		RU1503150		RU1403153		Antonio		RU1303163		RU1403166		RU1503169		RU1303172		RU1503175		RU1403181		RU1303184
9'		S5-49		S5-50		S5-51		S5-52		S5-53		S5-54		S5-55		S5-56		S5-57		S5-58		S5-59		S5-60	9'
ShB(0=9)	Rep 1	5		5		5		7		7		9		7		8		5		6		9		4
ShB(0=9)	Rep 2	5		5		6		7		7		9		6		8		6		5		9		5
ShB(0=9)	Rep 3	5		5		5		8		7		9		7		8		5		6		9		4
NBLS (0-9)	Rep 1	0		4		6		5		7		7		4		5		5		8		6		0	8'
NBLS (0-9)	Rep 2	0		4		6		6		6		7		3		5		5		8		7		0
NBLS (0-9)	Rep 3	0		4		6		5		7		7		4		5		5		7		6		0
Growth stage		near mature		near mature		near mature		mature		mature		near mature		near mature		mature		near mature		near mature		mature		Near mature
Variety/line		RU1403141		RU1403138		RU1303135		RU1503132		RU1403129		RU1503126		RU1003123		RU1303116		RU1003113		RU1503110		RU1503107		RU1403104
		S5-48		S5-47		S5-46		S5-45		S5-44		S5-43		S5-42		S5-41		S5-40		S5-39		S5-38		S5-37
ShB(0=9)	Rep 1	5		8		7		7		6		6		8		8		7		8		5		6
ShB(0=9)	Rep 2	5		9		8		7		7		5		8		9		8		8		6		7
ShB(0=9)	Rep 3	5		8		7		7		6		5		8		8		8		8		6		7
NBLS (0-9)	Rep 1	3		4		0		0		0		3		5		5		5		5		4		6	8'
NBLS (0-9)	Rep 2	4		5		0		0		0		4		5		5		5		4		5		7
NBLS (0-9)	Rep 3	4		4		0		0		0		3		5		6		5		5		4		6
Growth stage		near mature		near mature		hard dough		hard dough		near mature		hard dough		near mature		mature		mature		near mature		near mature		mature
Variety/line		RU0703181		RU1003153		RU0903086		RU1503069		RU1303181		RU0903190		RU1203190		RU1203086		RU1403089		RU1503092		RU1503098		RU1403101
9'		S5-25		S5-26		S5-27		S5-28		S5-29		S5-30		S5-31		S5-32		S5-33		S5-34		S5-35		S5-36	9'
ShB(0=9)	Rep 1	5		5		7		6		9		7		7		8		7		8		6		5
ShB(0=9)	Rep 2	5		4		7		6		9		8		8		9		7		8		7		5
ShB(0=9)	Rep 3	5		5		7		6		9		7		7		8		6		8		6		5
NBLS (0-9)	Rep 1	4		0		5		0		7		8		6		5		0		7		4		5	8'
NBLS (0-9)	Rep 2	3		0		4		0		7		8		6		4		0		7		4		4
NBLS (0-9)	Rep 3	4		0		5		0		7		8		6		5		0		7		4		5
Growth stage		near mature		hard dough		near mature		hard dough		near mature		mature		mature		Near mature		near mature		mature		near mature		near mature
Variety/line		RU0903147		RU1303153		RU0803181		RU1303138		RU0803153		RU1003098		Presidio		RU0803147		RU0903141		RU0803190		CL163		Rex
		S5-24		S5-23		S5-22		S5-21		S5-20		S5-19		S5-18		S5-17		S5-16		S5-15		S5-14		S5-13
ShB(0=9)	Rep 1	8		8		6		5		7		8		5		5		5		8		5		8
ShB(0=9)	Rep 2	9		7		7		6		7		8		5		4		5		8		6		9
ShB(0=9)	Rep 3	8		7		7		6		7		8		6		5		5		8		5		8
NBLS (0-9)	Rep 1	9		7		6		0		5		7		0		0		0		8		5		7	8'
NBLS (0-9)	Rep 2	9		7		6		0		5		8		0		0		0		8		5		8
NBLS (0-9)	Rep 3	8		7		6		0		5		7		0		0		0		8		5		7
Growth stage		mature		near mature		near mature		near mature		near mature		mature		hard dough		Mid dough		near mature		mature		hard dough		near mature
Variety/line		Cl111		CL151		Mermentau		Jupiter		Cheniere		Cocodrie		CL271		LAH10		LAH169		Jazzman2		Della2		CL152
		S5-1		S5-2		S5-3		S5-4		S5-5		S5-6		S5-7		S5-8		S5-9		S5-10		S5-11		S5-12
														Drive way
General Growth Stages of Rice:
See germination, seeding, tillering, panicle differentiation (PD), boot, heading, milk, soft dough, medium dough, hard dought, and maturity.

## Sheet: RC 10-21
Plant Pathology Group: Beaumont field strip 2015
SB-5, 67 entries, Disease Nursery for ratoon crop (RC) (ShB = Sheath blight; NBLS = Narrow brown leaf spot)
Disease assessment date:10/21/2015
														Leeve
		4'		4'		4'		4'		4'		4'		4'		4'		4'		4'		4'		4'
ShB(% stand loss)	Rep 1											60		70		65		70		70		10		30
ShB(% stand loss)	Rep 2											70		60		65		70		75		15		30
ShB(% stand loss)	Rep 3											60		70		60		75		70		10		20
NBLS (0-9)	Rep 1											0		3		4		0		5		2		2
NBLS (0-9)	Rep 2											0		4		3		0		5		3		3
NBLS (0-9)	Rep 3											0		3		4		0		6		2		2	8'
Growth stage												Heading		Heading		Heading		Heading		Heading		Heading		Boot
Variety/line												XP760		XL753		CLXL729		CLXL745		Colorado		Rhondo		RU1403190
												S5-67		S5-66		S5-65		S5-64		S5-63		S5-62		S5-61
ShB(% stand loss)	Rep 1	40		60		90		50		20		60		50		50		70		60		75		70
ShB(% stand loss)	Rep 2	30		60		90		55		25		70		50		60		80		60		80		60
ShB(% stand loss)	Rep 3	30		60		90		50		20		70		50		60		80		50		70		60
NBLS (0-9)	Rep 1	4		3		3		3		3		2		4		3		3		2		2		4	8'
NBLS (0-9)	Rep 2	4		3		4		4		4		3		4		4		3		3		3		3
NBLS (0-9)	Rep 3	4		3		3		3		3		2		4		3		3		2		2		3
Growth stage		Boot		Boot		Boot		Heading		Heading		Boot		Heading		Heading		Boot		Boot		Heading		Boot
Variety/line		RU1303144		RU1503147		RU1503150		RU1403153		Antonio		RU1303163		RU1403166		RU1503169		RU1303172		RU1503175		RU1403181		RU1303184
9'		S5-49		S5-50		S5-51		S5-52		S5-53		S5-54		S5-55		S5-56		S5-57		S5-58		S5-59		S5-60	9'
ShB(% stand loss)	Rep 1	30		50		30		50		70		85		40		40		60		40		60		50
ShB(% stand loss)	Rep 2	35		50		20		50		70		80		50		50		60		40		70		50
ShB(% stand loss)	Rep 3	30		50		30		40		70		85		50		40		70		45		70		50
NBLS (0-9)	Rep 1	3		3		4		2		0		3		2		2		4		3		3		4	8'
NBLS (0-9)	Rep 2	4		2		4		2		0		3		3		3		4		3		2		5
NBLS (0-9)	Rep 3	3		3		3		2		0		3		2		2		4		3		3		4
Growth stage		Boot		Boot		Heading		Boot		Boot		Heading		Boot		Boot		Heading		Boot		Boot		milk
Variety/line		RU1403141		RU1403138		RU1303135		RU1503132		RU1403129		RU1503126		RU1003123		RU1303116		RU1003113		RU1503110		RU1503107		RU1403104
		S5-48		S5-47		S5-46		S5-45		S5-44		S5-43		S5-42		S5-41		S5-40		S5-39		S5-38		S5-37
ShB(% stand loss)	Rep 1	40		50		80		80		60		70		70		50		70		70		80		50
ShB(% stand loss)	Rep 2	45		45		75		85		70		80		75		50		70		60		80		60
ShB(% stand loss)	Rep 3	40		45		80		90		70		70		70		45		70		70		80		50
NBLS (0-9)	Rep 1	3		3		2		1		2		3		2		45		2		2		2		0	8'
NBLS (0-9)	Rep 2	3		3		2		2		3		4		2		4		3		3		2		0
NBLS (0-9)	Rep 3	3		3		2		2		2		3		3		3		2		2		2		0
Growth stage		Heading		Boot		Boot		Heading		Heading		Heading		Boot		Heading		Heading		Heading		Boot		Boot
Variety/line		RU0703181		RU1003153		RU0903086		RU1503069		RU1303181		RU0903190		RU1203190		RU1203086		RU1403089		RU1503092		RU1503098		RU1403101
9'		S5-25		S5-26		S5-27		S5-28		S5-29		S5-30		S5-31		S5-32		S5-33		S5-34		S5-35		S5-36	9'
ShB(% stand loss)	Rep 1	20		60		50		70		70		50		40		70		40		60		80		20
ShB(% stand loss)	Rep 2	30		70		50		70		70		50		40		70		40		60		70		20
ShB(% stand loss)	Rep 3	20		70		50		60		50		50		50		70		45		55		70		20
NBLS (0-9)	Rep 1	4		4		3		0		3		3		4		3		3		3		4		0	8'
NBLS (0-9)	Rep 2	4		4		3		0		4		3		4		4		3		3		4		0
NBLS (0-9)	Rep 3	4		4		4		0		3		3		3		4		3		3		4		0
Growth stage		Boot		Heading		Heading		Heading		Boot		Heading		Boot		Boot		Boot		Boot		Boot		Boot
Variety/line		RU0903147		RU1303153		RU0803181		RU1303138		RU0803153		RU1003098		Presidio		RU0803147		RU0903141		RU0803190		CL163		Rex
		S5-24		S5-23		S5-22		S5-21		S5-20		S5-19		S5-18		S5-17		S5-16		S5-15		S5-14		S5-13
ShB(% stand loss)	Rep 1	10		10		30		60		70		30		60		50		80		15		15		40
ShB(% stand loss)	Rep 2	10		10		40		50		80		35		50		50		70		10		10		50
ShB(% stand loss)	Rep 3	15		10		30		60		70		30		60		45		80		15		15		50
NBLS (0-9)	Rep 1	3		3		0		3		3		4		3		3		3		4		3		0	8'
NBLS (0-9)	Rep 2	4		4		0		3		4		3		3		3		3		3		4		0
NBLS (0-9)	Rep 3	3		4		0		3		3		4		3		4		3		4		3		0
Growth stage		Boot		Boot		Boot		Heading		Boot		Boot		Heading		Heading		Heading		Heading		Boot		Boot
Variety/line		Cl111		CL151		Mermentau		Jupiter		Cheniere		Cocodrie		CL271		LAH10		LAH169		Jazzman2		Della2		CL152
		S5-1		S5-2		S5-3		S5-4		S5-5		S5-6		S5-7		S5-8		S5-9		S5-10		S5-11		S5-12
														Drive way
General Growth Stages of Rice:
See germination, seeding, tillering, panicle differentiation (PD), boot, heading, milk, soft dough, medium dough, hard dought, and maturity.
